# Supplementary material for: Strain-engineering the in-plane electrical anisotropy of GeSe monolayers
Source: Royal Society of Chemistry journal article supplement (doi:10.1039/c9cp05058b), 2019-12-10
Supplement: c9cp05058b1.pdf [file c9cp05058b1.pdf]

## Supplementary information

for

### Strain-engineering the electrical anisotropy of GeSe monolayer

Zongbao Li,<sup>a</sup> Xinsheng Liu,<sup>\*,b</sup> Xia Wang,<sup>a</sup> Yusi Yang,<sup>c</sup> Shun-Chang Liu,<sup>c,d</sup> Wei Shi,<sup>a</sup> Yong Li,<sup>a</sup>  
Xiaobo Xing,<sup>e</sup> Ding-Jiang Xue<sup>\*,c,d</sup> and Jin-Song Hu<sup>c,d</sup>

<sup>a</sup>School of Material and Chemical Engineering, Tongren University, Tongren 554300, China

<sup>b</sup>Key Laboratory for Special Functional Materials of Ministry of Education, Henan University, Kaifeng 475004, China

<sup>c</sup>Beijing National Laboratory for Molecular Sciences (BNLMS), CAS Key Laboratory of Molecular Nanostructure and Nanotechnology, Institute of Chemistry, Chinese Academy of Sciences (CAS), Beijing 100190, China

<sup>d</sup>School of Chemical Sciences, University of Chinese Academy of Sciences, Beijing 100049, China

<sup>e</sup>Centre for Optical and Electromagnetic Research, Guangdong Provincial Key Laboratory of Optical Information Materials and Technology, South China Academy of Advanced Optoelectronics, South China Normal University, Guangzhou 510006, China

\*The correspondence should be addressed to [xinshengliu@henu.edu.cn](mailto:xinshengliu@henu.edu.cn) and [djxue@iccas.ac.cn](mailto:djxue@iccas.ac.cn).

**Fig. S1.**

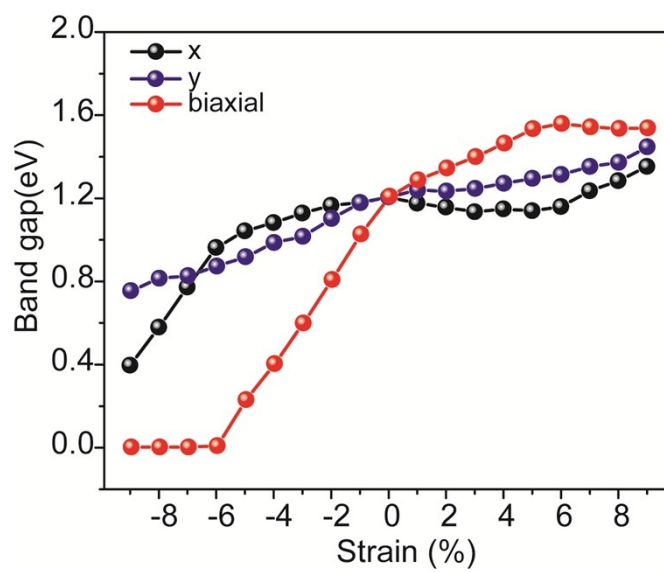

**Fig. S1** Calculated band gap of GeSe monolayer under different strains.

**Fig. S2**

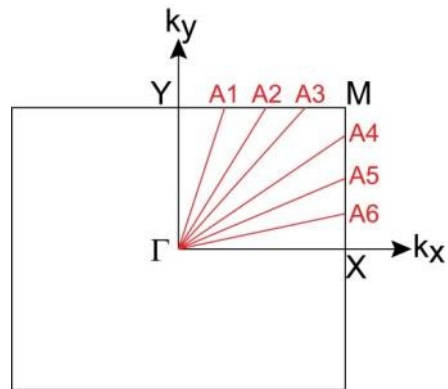

**Fig. S2** Brillouin zone path adopted for the polar plots of the anisotropic effective mass.

**Fig. S3**

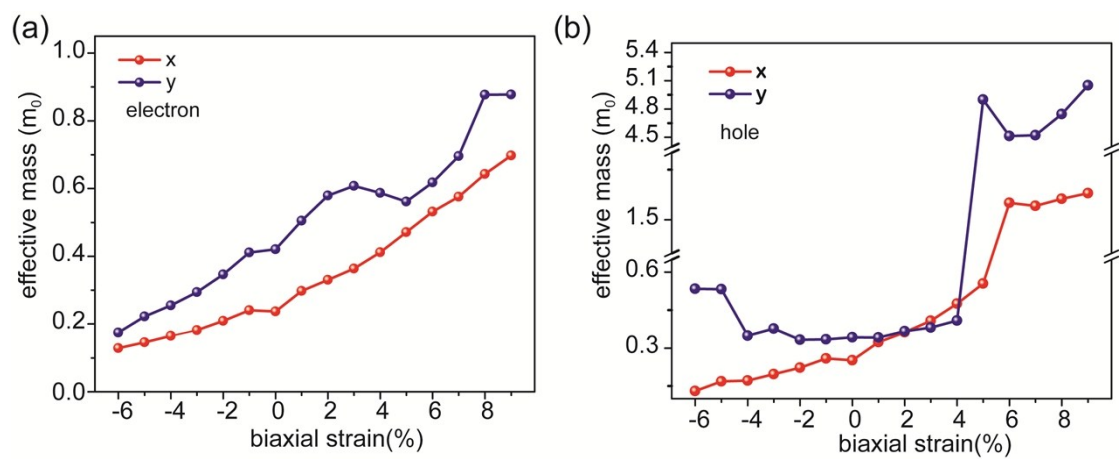

**Fig. S3** Effective masses of electron and hole under different biaxial strain.

**Fig. S4**

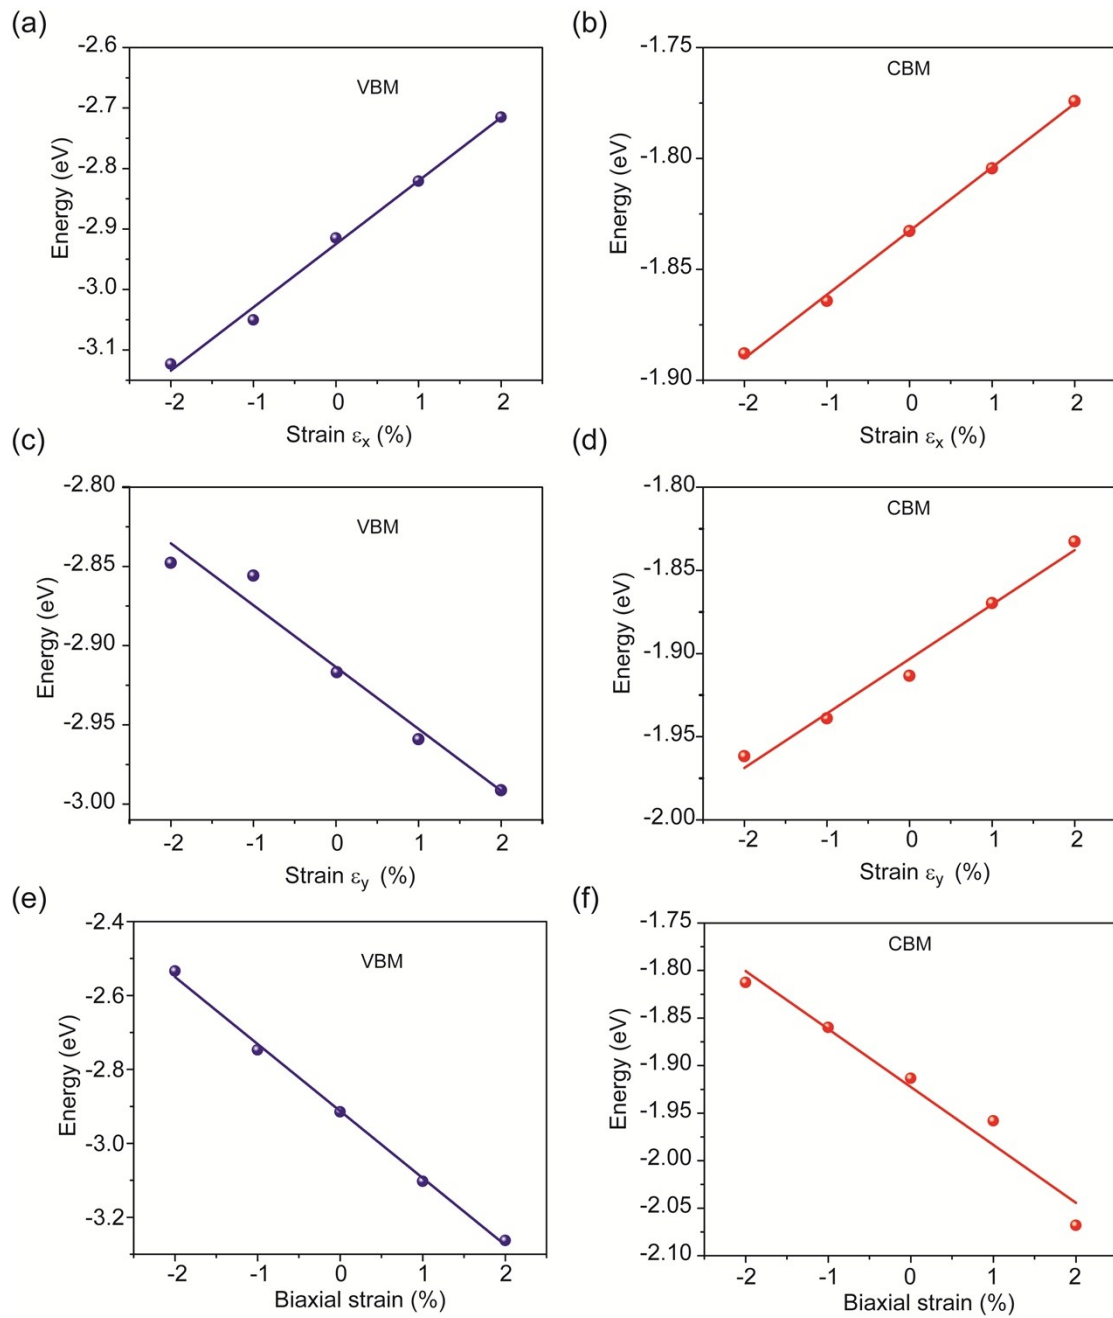

**Fig. S4** Fermi level shift with respect to the lattice dilation  $\Delta/l_0$  along different directions. Linear fit of the data gives the DP constant.

**Fig. S5**

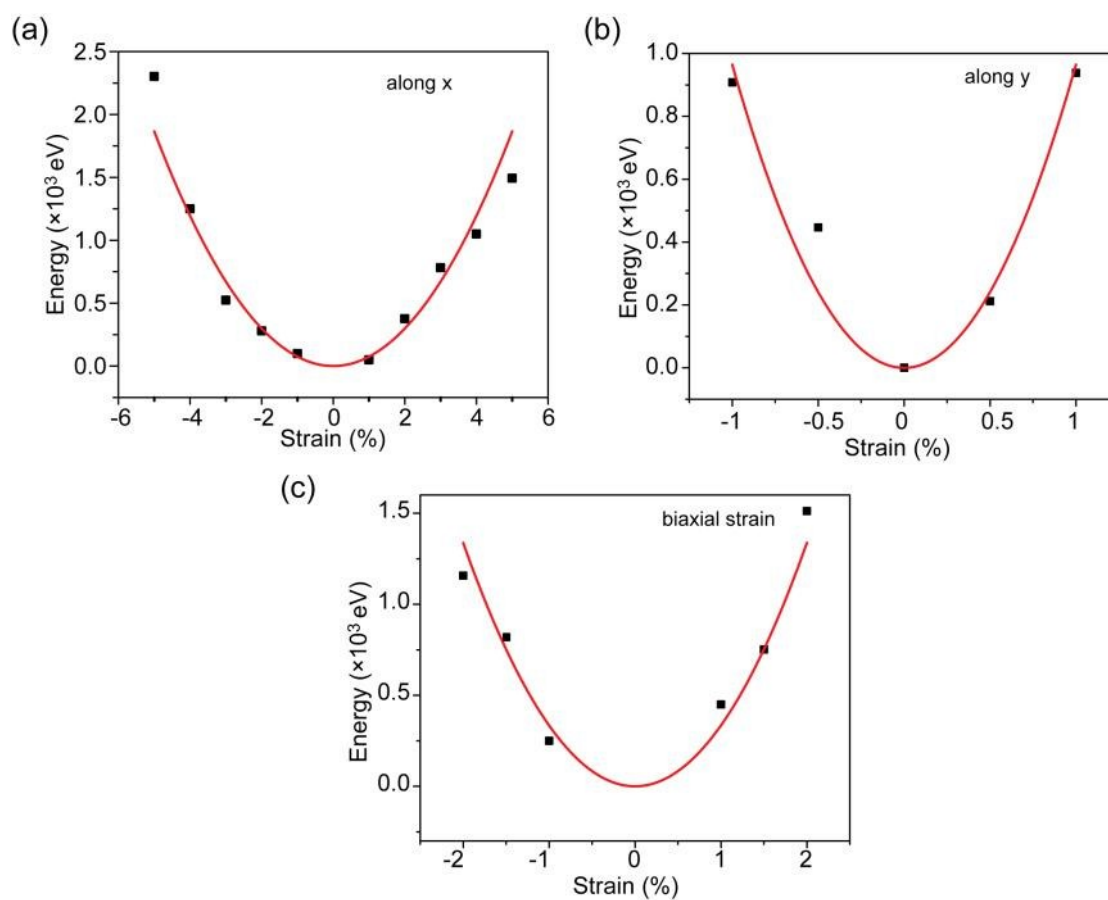

**Fig. S5** Evolution of total energy with respect to the lattice dilation  $\Delta/l_0$  along different directions. Quadratic fit of the data gives the 2D elastic constant.

**Fig. S6**

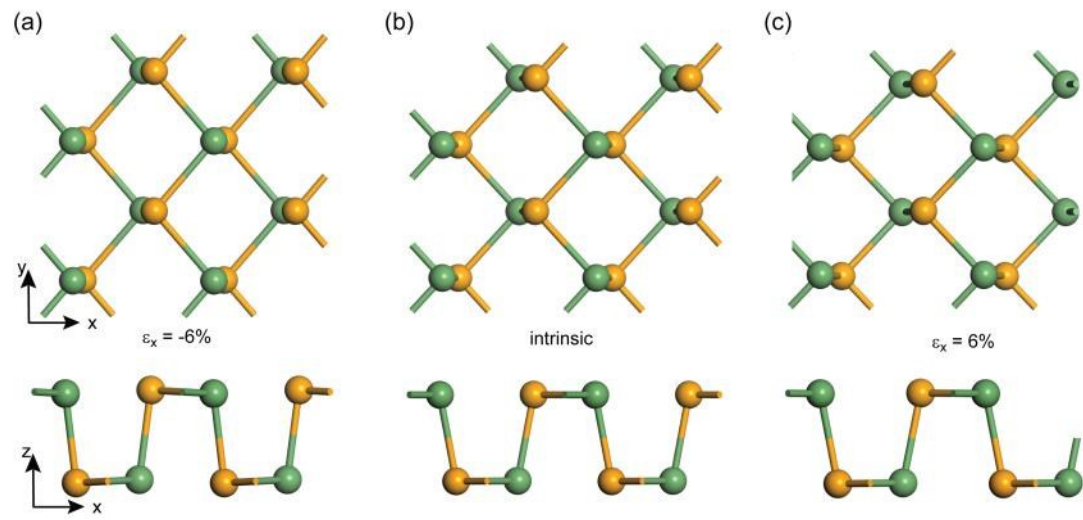

**Fig. S6** Configuration of GeSe monolayer under strains along armchair. (a) Compression with  $\epsilon_x = -6\%$ . (b) Optimized structure without strain. (c) Tension with  $\epsilon_x = 6\%$ . Top and side views are displayed in all panels.

**Fig. S7**

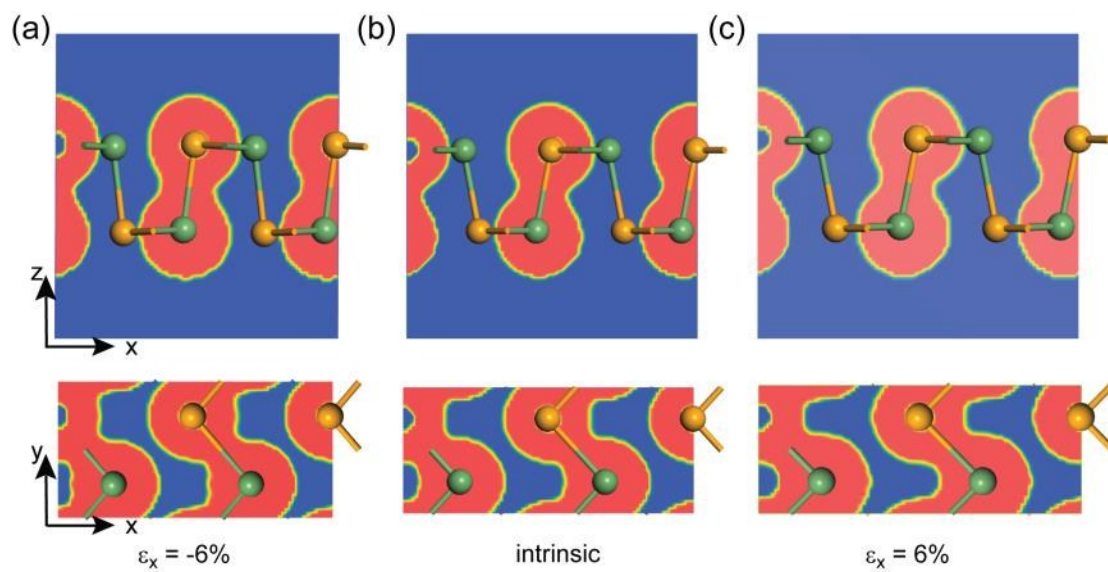

**Fig. S7** Charge density of Ge-Se bond  $b_{13}$  (top) and  $b_{34}$  (down) under strains along armchair. (a) Compression with  $\epsilon_x = -6\%$ . (b) Optimized structure without strain. (c) Tension with  $\epsilon_x = 6\%$ . The iso-value of the charge density is  $0.005 \text{ e \AA}^{-3}$ .



**Table S1****Table S1** Lattice constants of intrinsic bulk GeSe

| lattice constants |       |       | band gap    |                        |
|-------------------|-------|-------|-------------|------------------------|
| a (Å)             | b (Å) | c (Å) | (eV)        |                        |
| 4.41              | 3.84  |       | 1.16        | Ref. R1                |
| 4.39              | 3.90  | 10.93 |             | Ref. R2                |
| 4.378             | 3.839 | 10.84 | 1.14, 1.20  | Ref. R3, R4 (Exp.)     |
| 4.46              | 3.848 | 10.96 | 0.907/1.252 | Our results(PBE/HSE06) |

R1 Y. H. Hu, S. L. Zhang, S. F. Sun, M. Q. Xie, B. Cai and H. H. Zeng, *Appl. Phys. Lett.* 2015, **107**, 122107.

R2 L. C. Gomes, A. Carvalho and A. H. Castro Neto, *Phys. Rev. B*, 2016, **94**, 054103.

R3 D.-J. Xue, S.-C. Liu, C. M. Dai, S. Chen, C. He, L. Zhao, J.-S. Hu and L. J. Wan, *J. Am. Chem. Soc.*, 2017, **139**, 958-965.

R4 P. D. Antunez, J. J. Buckley and R. L. Brutchey, *Nanoscale*, 2011, **3**, 2399.

**Table S2****Table S2** Selected bonds and angles of GeSe monolayer under different strains along armchair

|                     | bond 1-3 (Å) | bond 3-4 (Å) | $\theta_{132}$ (°) | $\theta_{234}$ (°) |
|---------------------|--------------|--------------|--------------------|--------------------|
| $\epsilon_x = -6\%$ | 2.6741       | 2.4909       | 98.661             | 96.198             |
| intrinsic           | 2.6086       | 2.5117       | 94.968             | 96.932             |
| $\epsilon_x = -6\%$ | 2.5587       | 2.5308       | 90.183             | 98.734             |
